# 1 Evolution of multicellularity by collective 2 integration of spatial information

3 Enrico Sandro Colizzi, Renske M.A. Vroomans, Roeland M.H. Merks

4 **Affiliations** E.S. Colizzi: Mathematical Institute, Leiden University; Origins  
5 Center, University of Groningen.

6 R.M.A. Vroomans: Informatics Institute, University of Amsterdam; Origins Cen-  
7 ter, University of Groningen.

8 R.M.H. Merks: Mathematical Institute, Leiden University; Institute of Biology,  
9 Leiden University.

## 10 **Abstract**

11 At the origin of multicellularity, cells may have evolved aggregation in  
12 response to predation, for functional specialisation or to allow large-scale  
13 integration of environmental cues. These group-level properties emerged  
14 from the interactions between cells in a group, and determined the selection  
15 pressures experienced by these cells.

16 We investigate the evolution of multicellularity with an evolutionary  
17 model where cells search for resources by chemotaxis in a shallow, noisy  
18 gradient. Cells can evolve their adhesion to others in a periodically chang-  
19 ing environment, where a cell's fitness solely depends on its distance from  
20 the gradient source.

21 We show that multicellular aggregates evolve because they perform chemo-  
22 taxis more efficiently than single cells. Only when the environment changes  
23 too frequently, a unicellular state evolves which relies on cell dispersal. Both  
24 strategies prevent the invasion of the other through interference competition,  
25 creating evolutionary bi-stability. Therefore, collective behaviour can be an  
26 emergent selective driver for undifferentiated multicellularity.

## 27 **1 Introduction**

28 The evolution of multicellularity is a major transition in individuality, from au-  
29 tonomously replicating cells to groups of interdependent cells forming a higher-  
30 level of organisation [1, 2]. It has evolved independently several times across the  
31 tree of life [3, 4]. Comparative genomics suggests [5], and experimental evolution  
32 confirms [6, 7] that the increase of cell-cell adhesion drives the early evolution  
33 of (undifferentiated) multicellularity. Increased cell adhesion may be temporally  
34 limited and/or may be triggered by environmental changes (e.g. in Dictyostelids  
35 and Myxobacteria [8, 9]). Moreover, multicellular organisation may come about  
36 either by aggregation of genetically distinct cells or by incomplete separation after  
37 cell division [8, 10].

38 The genetic toolkit and the cellular components that allow for multicellularity  
39 - including adhesion proteins - pre-date multicellular species and are found in  
40 their unicellular relatives [8, 11–13]. Aggregates of cells can organise themselves  
41 by exploiting these old components in the new multicellular context, allowing  
42 them to perform novel functions (or to perform old functions in novel ways) that  
43 may confer some competitive advantage over single cells. Greater complexity can  
44 later evolve by coordinating the division of tasks between different cell lineages  
45 of the same organism (e.g. in the soma-germline division of labour), giving rise  
46 to embryonic development. Nevertheless, the properties of early multicellular  
47 organisms are defined by self-organised aggregate cell dynamics, and the space of  
48 possible multicellular outcomes and emergent functions resulting from such self-  
49 organisation seems large – even with limited differential adhesion and signalling  
50 between cells. However, the evolution of emergent functions as a consequence of  
51 adhesion-mediated self-organisation has received little attention to date.

52 Mathematical models can define under which conditions multicellularity evolves,  
53 in terms of fitness for individual cells vs. the group, or in terms of the resulting  
54 spatial and temporal organisation. The formation of early multicellular groups has  
55 been studied in the context of the evolution of cooperation: by incorporating game  
56 theoretical interactions and transient compartmentalisation [14] or the possibility  
57 of differential assortment [15], it was found that adhering groups of cooperating  
58 individuals evolve. Alternatively, costly reproductive trade-offs in a structured en-  
59 vironment can give rise to division of labour and the formation of a higher-level

60 proto-organism capable of self-regeneration [16]. A plethora of multicellular life-  
61 cycles can emerge by simple considerations about the ecology of the uni-cellular  
62 ancestor and the fitness benefit that cells acquire by being in groups [17]. Once  
63 multicellular clusters are established, the spatial organisation of their composing  
64 cells can play an important role in determining group-level reproduction - possibly  
65 leading to the evolution of cell-death [18] and to specific modes of fragmentation  
66 of the aggregate [19, 20] that increase overall population growth.

67 In these models, multicellularity is either presupposed or its selective pressure  
68 is predetermined by social dynamics, by directly increasing fitness of cells in ag-  
69 gregates or by adverse environmental conditions that enforce strong trade-offs.  
70 Here we investigate the origin of this selective pressure, motivated by the idea  
71 that multicellular groups emerge as a byproduct of cell self-organisation and cell-  
72 environment interactions, and subsequently alter the evolution of their composing  
73 cells. We expect that a selective pressure to aggregate can arise from the emergent  
74 functions of the multicellular group, without requiring explicit selective advan-  
75 tages and disadvantages for cells in a group. We therefore present a computational  
76 model of an evolving population of cells where fitness is based solely on how ad-  
77 equately a cell responds to a spatially and temporally heterogeneous environment,  
78 regardless of whether they belong to an aggregate.

79 We draw inspiration from the life cycle of the slime mould *Dictyostelium dis-*  
80 *coideum* and in particular its slug phase (described in e.g. [21]), in that we let cells  
81 move preferentially towards the source of a noisy chemotactic gradient. Cells have  
82 a higher chance to reproduce when they are close to the source of the gradient at  
83 the end of each season. Upon reproduction, cells can evolve their adhesion to one  
84 another - and therewith undifferentiated multicellularity - when the emergent col-  
85 lective behaviour of cell clusters turns out to be advantageous within the structure  
86 of the changing environment.

87 With this model setup, we consider collective cell movement as an emergent  
88 driver of multicellularity. Collective movement is important in simpler multice-  
89 lular organisms [21–23] as well as in many processes within complex multice-  
90 lular organisms, such as embryogenesis, tissue repair and cancer [24, 25], and has  
91 been modelled extensively [26–32]. In our model, cells perform chemotaxis to-

92 wards the source of a noisy, shallow chemokine gradient. While individual cells  
93 follow the chemotactic signal very inefficiently, groups of cells exhibit efficient  
94 chemotaxis due to the "many wrongs" principle [33]. We show that this emer-  
95 gent property of cell groups is sufficient to select for high levels of adhesion and  
96 multicellularity, despite the fact that fitness is only defined at the cell level.

## 97 **2 Results**

98 **Model setup** We consider a population of cells on a grid that search for re-  
99 sources to be able to replicate. We explicitly account for cell shape and inter-  
100 actions by implementing a 2D hybrid Cellular Potts Model on a square lattice  
101 [34–36]. Cells can adhere to each other if they express matching ligands and re-  
102 ceptors on their surface. A better ligand-receptor match is translated to stronger  
103 adhesion, quantified by cell-cell and cell-medium adhesion energy (respectively  
104  $J_{c,c}$  and  $J_{c,m}$  in units of energy per unit surface, see Fig. 1a and Methods).

105 We implemented two types of cell migration: persistent random walk (Fig. 1b)  
106 and chemotaxis towards higher local concentrations of a chemokine (Fig. 1c).  
107 These chemokines are released by resources present at one end of the grid, cre-  
108 ating a shallow and noisy gradient throughout the grid (Fig. 1c). Because of the  
109 noise in the gradient, the direction of cell's chemotaxis may be different from the  
110 correct direction of the gradient. We used this model setup to assess the properties  
111 of single-cell vs. collective migration.

112 To explore the evolutionary dynamics of a population of cells, we let the loca-  
113 tion of the resources change seasonally (thus creating an additional temporal vari-  
114 ation in the direction of the gradient every  $\tau_s$  MCS). This allows cells to evolve  
115 their adhesion strength. During each season in the evolutionary simulations (i.e.  
116 one period of  $\tau_s$  MCS) cells move due to chemotaxis and persistent migration, and  
117 may adhere to or repel each other by means of the receptors and ligands expressed  
118 on their surface (Fig. 2). At the end of the season, cells divide with a probability  
119 proportional to their distance to the peak of the gradient, thus assuming that more  
120 nutrients are present where the chemotactic signal is larger. The daughter cells  
121 inherit mutated copies of the ligand and receptor, so that their adhesive properties  
122 change with respect to the parent; cell size  $A_T$ , strength of chemotaxis  $\mu_\chi$  and

123 migration persistence  $\mu_p$  do not evolve. Finally, we keep the population size con-  
124 stant by randomly culling the population in excess, at which point the new season  
125 begins. We do not select for multicellularity directly: fitness is defined at the level  
126 of the single cell, and we do not explicitly incorporate a fitness advantage or dis-  
127 advantage for the multicellular state. Therefore, multicellular clusters can arise  
128 only because they perform an emergent task that single cells cannot perform.

129 **Strongly adhering cells perform efficient collective chemotaxis** We first as-  
130 sessed how well groups of cells with different adhesion strengths could reach the  
131 source of the chemotactic signal; we characterise adhesion strength by the cell's  
132 surface tension  $\gamma = J_{c,m} - J_{c,c}/2$ , so that cells adhere to one another if  $\gamma > 0$ . We  
133 recorded the travel distance of a group of cells over a fixed amount of time and  
134 compare it to the travel distance of single cells, by measuring both the position  
135 of the center of mass of the group (fig. 3a) and the position of the cell closest to  
136 the peak of the gradient (Fig. 3b). Single cells perform chemotaxis inefficiently  
137 (Fig. 3a) and show large variance between different simulations (Fig. 3b). A group  
138 of adhering cells ( $\gamma > 0$ ) can migrate up the same gradient more accurately: the  
139 center of mass of this group takes much less time than single cells do to reach the  
140 peak of the gradient (Fig. 3a). Groups of cells can also perform collective chemo-  
141 taxis when they do not adhere ( $\gamma < 0$ ), and when they do not have a preference  
142 for medium or cells ( $\gamma \approx 0$ ), although with lower efficiency in both cases. The  
143 velocity of the cell closest to the peak of the gradient is, instead, roughly the same  
144 regardless of adhesion strength (Fig. 3b).

145 Adhering cells have large chemotactic persistence - as shown by the super-  
146 linear shape of the mean square displacement (MSD) plot (Fig. 3c,  $\gamma = 6$ ) and by  
147 a diffusive exponent consistently larger than 1 (Fig. 3d; the diffusive exponent is  
148 obtained as the derivative of the log-log transformed MSD/time curve). Instead,  
149 the MSD of individual cells (Fig. 3c,  $\gamma = -4$ ) is approximately linear and their  
150 diffusive exponent tends to 1, indicating that cells' movement is much more dom-  
151 inated by diffusion. Interestingly, there is no difference in the instantaneous speed  
152 of cells when they are in a cluster or when they are alone (Fig. 3e), so the higher  
153 rate of displacement of a group of adhering cells is only due to larger persistence  
154 in the direction of motion.

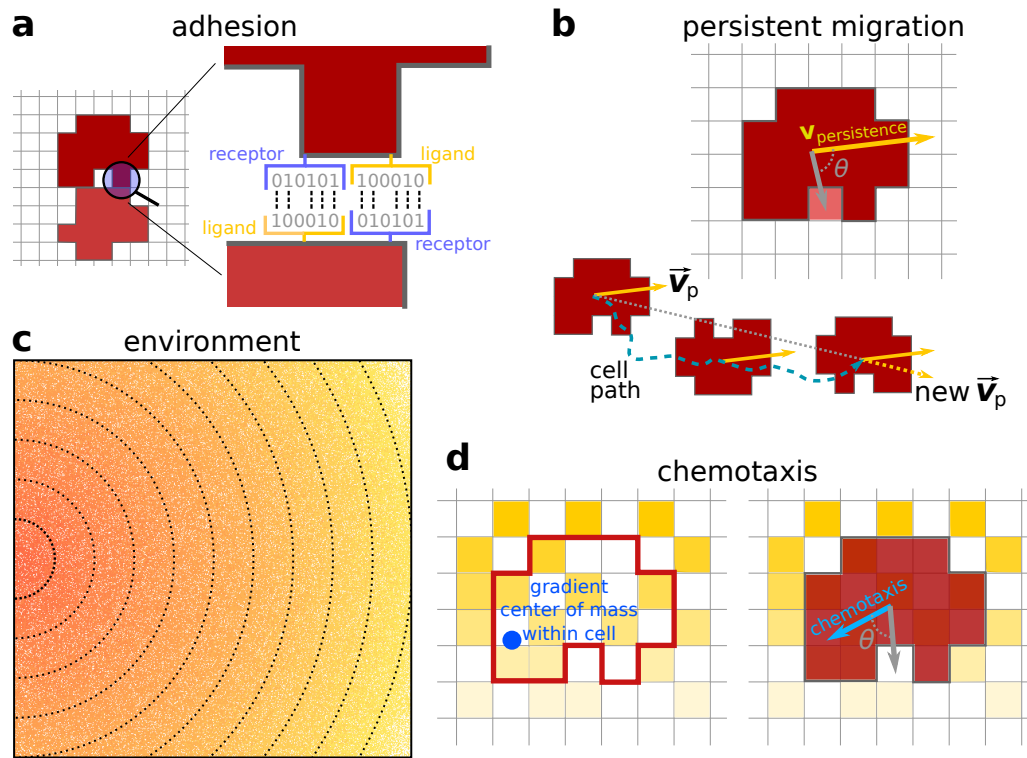

**Figure 1: Model description.** **a)** Adhesion between two cells is mediated by receptors and ligands (represented by a bitstring, see [37]). The receptor of one cell is matched to the ligand of the other cell and vice versa. The more complementary the receptors and ligands are, the lower the  $J$  values and the stronger the adhesion between the cells. **b)** Persistent migration is implemented by endowing each cell with a preferred direction of motion  $\vec{v}_p$ . Every  $\tau_p$  MCS, this direction is updated with a cell's actual direction of motion in that period. **c)** The chemokine gradient in the lattice. The lines and colour indicate equal amounts of chemokine. Note the scattered empty pixels. **d)** A cell can sense the chemokine in the lattice sites that correspond to its own location. The cell will then move preferentially in the direction of perceived higher concentration, the chemotaxis vector. This vector points from the cell's center of mass to the center of mass of the chemokine detected by the cell (the blue dot).

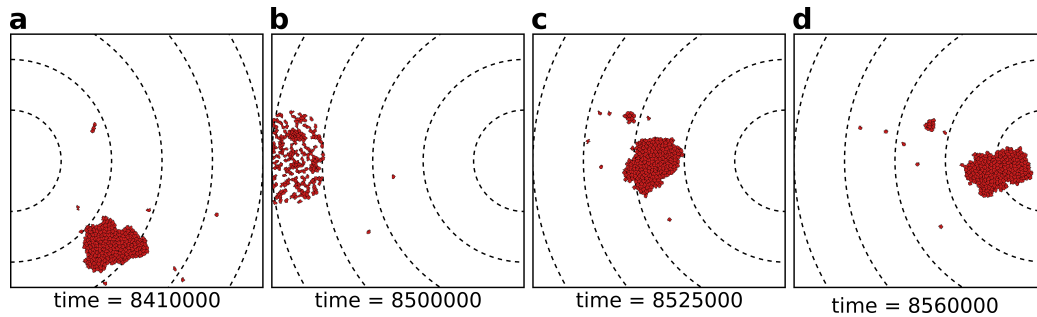

**Figure 2: The eco-evolutionary setup of the model:** **a)** A population of  $N = 200$  cells moves by chemotaxis towards the peak of the gradient, which in this season is located at the left boundary of the grid. **b)** At the end of the season, cells divide, the population excess is killed randomly, and the direction of the chemotactic signal is changed, after which the new season begins (**c**, **d**). The snapshots are taken at the indicated time points from a simulation where a season lasts  $\tau_s = 100 \times 10^3$  MCS. Dashed lines in the snapshots are gradient isoclines.

155 Within a group of adhering cells, small clusters align, pull and push on each  
156 other, generating extensions, retractions and rotations (see Supp. Video 1), so  
157 that the entire cluster visually resembles a single amoeboid cell (Supp. Video 2).  
158 This behaviour is not influenced by the presence of the chemotactic signal, since  
159 the flow field is identical in the two cases (Supp. Section S1). It is caused by  
160 the strong persistent motion of the individual cells, which aids in speeding up the  
161 movement of the cluster, but is not strictly required for chemotaxis (Supp. Section  
162 S2). Fig. 4 shows the movement of a cluster of strongly adhering cells ( $\gamma = 6$ )  
163 compared to the movement of a single cell, over the typical setup of the simulation  
164 system. Although the cluster moves straight towards the source of the gradient,  
165 individual cells follow noisy trajectories.

166 We calculated the deviation of each individual cell's measurement of the gra-  
167 dient as the angle  $\theta(\vec{X}, \vec{\chi})$  between the true direction of the gradient  $\vec{X}$  and the  
168 direction of the gradient locally measured by the cells  $\vec{\chi}$  (so that  $\theta(\vec{X}, \vec{\chi}) = 0$  is  
169 a perfect measure). We found that the measurements of individual cells deviate  
170 significantly from the true direction of the gradient (Fig. 3e). Despite this, they  
171 are carried in the right direction by the other cells.

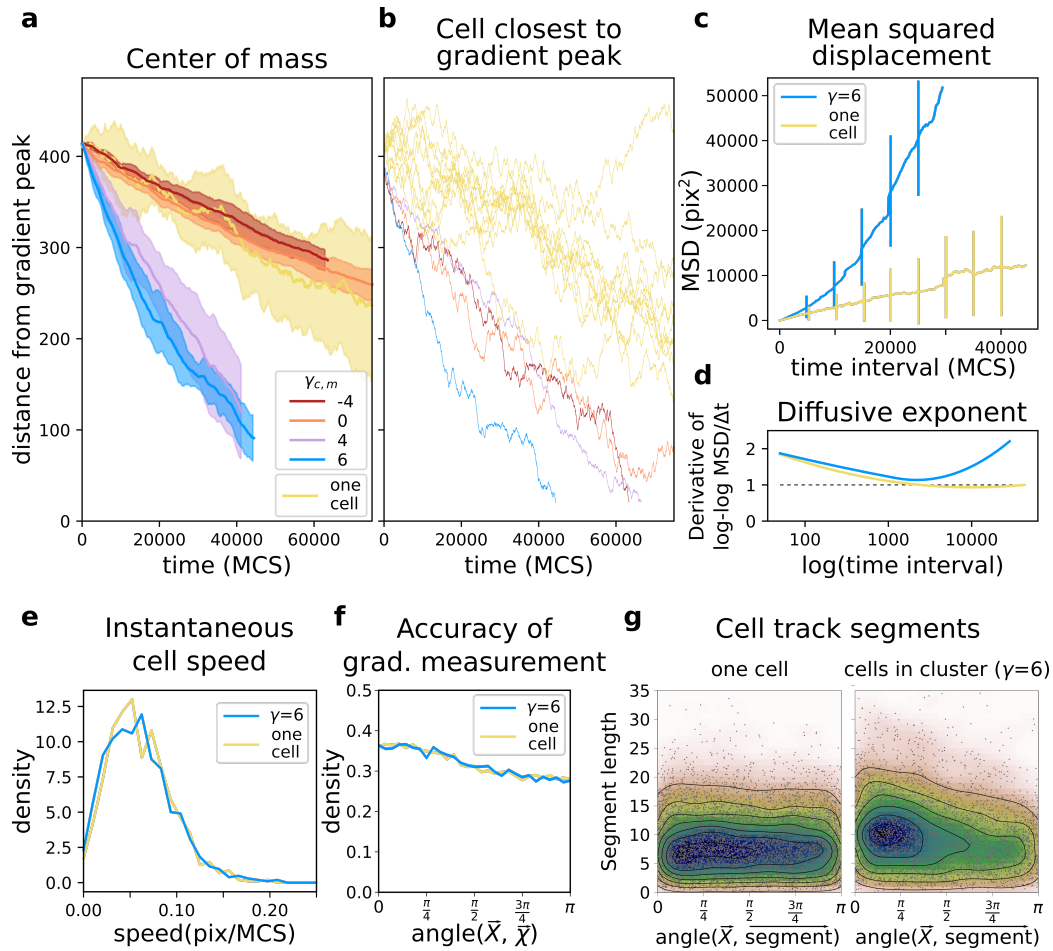

**Figure 3: A group of cells performs chemotaxis efficiently in a noisy shallow gradient.** **a)** Distance of the center of mass of  $N = 50$  cells from the peak of the gradient as a function of time, for different values of  $\gamma \in [-4, 6]$  (five independent runs for each value), together with the average position of 10 single cells (independently run). **b)** The position of the cell closest to the gradient origin as a function of time (taken from the same simulations as in **a**), and the positions of 10 individual cells (whose average generates the corresponding plot in **a**). **c)** Mean square displacement per time interval for two datasets each with 50 simulations of either single cells or clusters of strongly adhering cells ( $N = 50$ ,  $\gamma = 6$ ), in which case we extracted one cell per simulation. These data sets were also used for the following plots. **d)** Diffusive exponent extracted from the MSD plot, obtained from the log-log transformed MSD plots by fitting a smoothing function and taking its derivative. **e)** Distribution of instantaneous cell speeds **f)** Distribution of angles between cells' measurement of the gradient, and the actual direction of the gradient. **g)** The length of straight segments in cell tracks vs. their angle with the actual gradient direction. Each point represents one segment of a cell's trajectory. To extract these straight segments a simple algorithm was used (Supp. Mat. 3). Contour lines indicate density of data points.



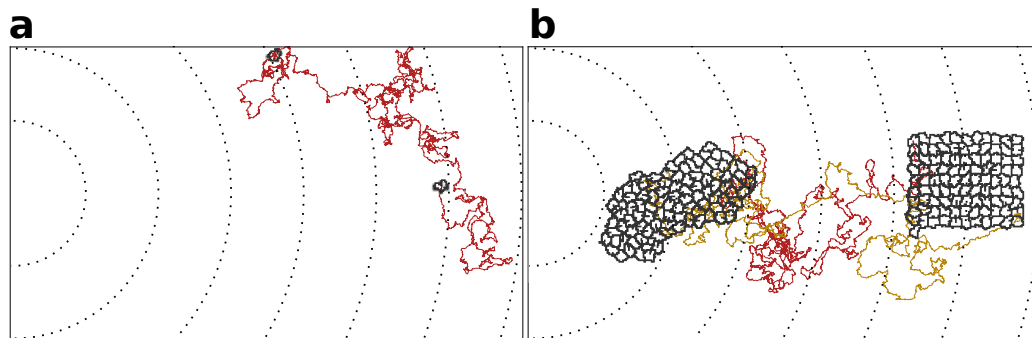

**Figure 4:** **a)** The movement of a single cell; **b)** Typical movement of a cluster of strongly adhering cells, and of the cells inside the cluster. Cells are placed on the right of the field and move towards higher concentration of the gradient (to the left of the field). Dashed lines are gradient isoclines.

172 Altogether, collective chemotaxis of a cluster of adhering cells emerges, despite  
173 each cell measuring the gradient as poorly as cells alone (Fig. 4f). Thus, cells  
174 within a cluster must be altering each others' paths by exerting pushing and pulling  
175 forces. To assess how these forces alter the short-timescale trajectories of cells, we  
176 extracted the straight segments from the cell tracks and assessed both the length  
177 of these segments and their orientation with respect to the gradient source (Supp.  
178 Section S3). We find that cells in a cluster tend to migrate for longer in straight  
179 lines, and that these straight lines are also more likely to be oriented towards the  
180 source of the gradient (Fig. 4g). For single cells, there is no such bias. Single  
181 cells could also improve their ability to sense the gradient by becoming bigger,  
182 since they will perceive a larger area of the chemotactic signal (Supp. Section  
183 S4). However, there are many factors that restrict how big a cell can be, such as  
184 the complexity of the metabolism and cellular mechanisms such as cell division  
185 [38, 39]. This also puts a limit on the area of a gradient that a cell can cover by  
186 sheer size. We therefore assume that cells can evolve adhesion, but not cell size.

187 **The evolution of uni- or multicellular strategies depends on environmental**  
188 **stability** The emergence of reliable chemotactic behaviour in adhering cell clus-  
189 ters suggests an evolutionary path to multicellularity: a population of cells may  
190 aggregate if chemotaxis is necessary for locating a resource. We therefore let  
191 cells' adhesion - i.e. the receptor and ligands expressed by the cells - evolve in  
192 response to a seasonally changing environment. Cells closer to the peak of the gra-  
193 dient have a higher chance to reproduce at the end of the season (see also model  
194 setup and Methods). The receptors and ligands of the initial population are chosen  
195 such that cells neither adhere nor repel each other ( $\gamma = 0$ ).

196 When the season lasts  $\tau = 100 \times 10^3$  MCS, the average adhesion between  
197 cells readily increases after only few generations (Fig. 5a):  $J_{\text{cell,cell}}$  decreases and  
198  $J_{\text{cell,medium}}$  increases (see also Supp. Video 3 and Fig. 2 for snapshots). Fig. 5b  
199 shows that two evolutionary steady states are possible, depending on the duration  
200 of the season  $\tau_s$ . For  $\tau_s < 20 \times 10^3$  MCS, cells evolve to become unicellular,  
201 as cell-cell interactions are characterised by strong repulsion ( $\gamma < 0$ ). Fig. 5c  
202 suggests that by selecting for  $\gamma < 0$  cells scatter efficiently throughout the grid.  
203 Although repelling cells follow the chemotactic signal only weakly, the spreading  
204 ensures that at least some cells end up close to the source of the gradient at the end  
205 of the season. In contrast, a cluster of adhering cells would not have enough time  
206 to reach the source of the chemotactic signal when seasons are short, and would all  
207 have the same (low) fitness (see the speed of a cluster in Fig. 3). For  $\tau_s > 40 \times 10^3$   
208 MCS, instead, cells evolve to adhere to one another, i.e.  $\gamma > 0$  (see Fig. 5c for  
209 a snapshot). When seasons are sufficiently long, clusters of adhering cells have  
210 enough time to reach the source of the gradient. At this point, the fitness of cells  
211 within a cluster outweighs that of non adhering cells, because clustering increases  
212 the chances of reaching the peak of the gradient. Finally, for intermediate season  
213 duration,  $20 \times 10^3 \leq \tau_s \leq 40 \times 10^3$  MCS, both repulsion and adhesion are  
214 evolutionary (meta) stable strategies, and the outcome of the simulation depends  
215 on initial conditions (for  $\tau_s = 20 \times 10^3$  MCS, the steady state with  $\gamma > 0$  is very  
216 weakly stable).

217 **Interference competition between unicellular and multicellular strategies causes**  
218 **evolutionary bi-stability** We next investigated what causes the evolutionary bi-  
219 stability in adhesion strategies for season duration  $20 \times 10^3 \leq \tau_s \leq 40 \times 10^3$

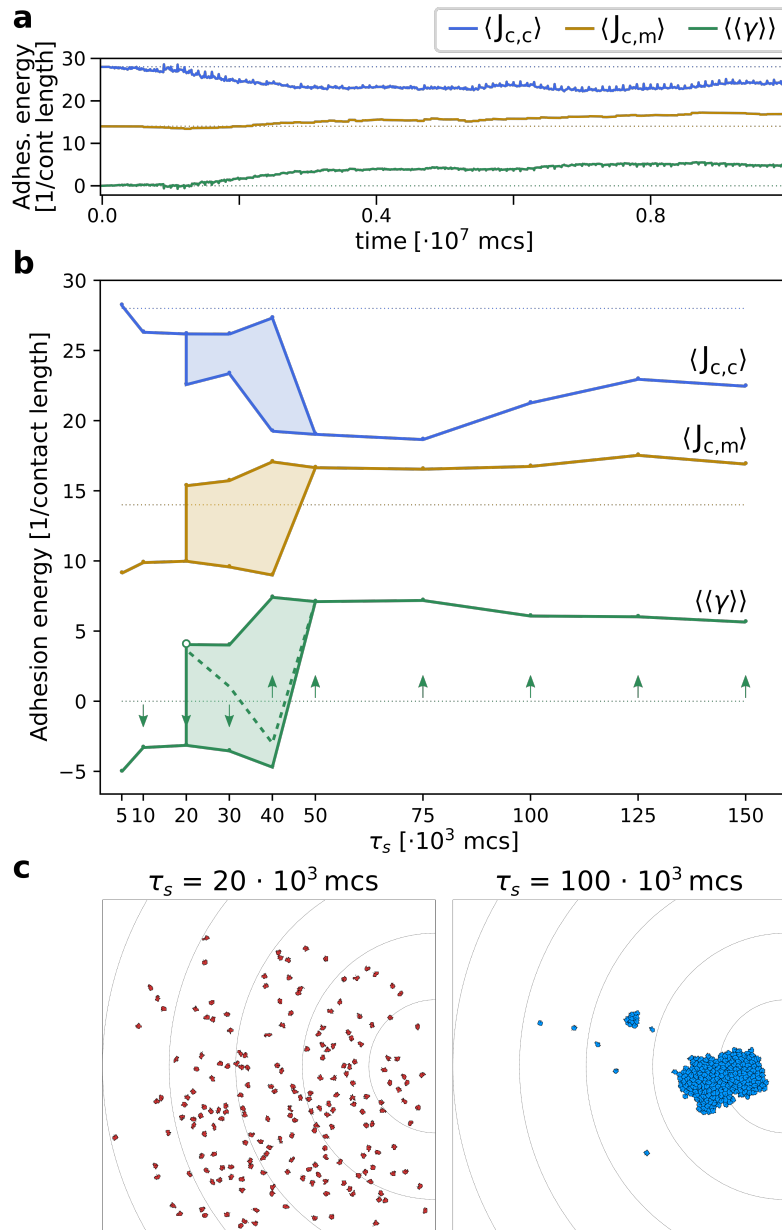

**Figure 5: The evolution of multicellularity.** **a**) Multicellularity ( $\gamma > 0$ ) rapidly evolves in a population of  $N = 200$  cells with  $\tau_s = 10^5$  (dotted lines represent initial conditions). **b**) Multicellularity only evolves when seasons are sufficiently long  $\tau_s \geq 50 \cdot 10^3$ ; unicellular strategies evolve when seasons are short  $\tau_s \leq 10 \cdot 10^3$ , and both strategies are viable depending on initial conditions for intermediate values of  $\tau_s$  (the dashed line indicates the separatrix between the basins of attraction of the two evolutionary steady states). **c**) Snapshots of the spatial distribution of the population at evolutionary steady state for  $\tau_s = 20 \cdot 10^3$  and  $\tau_s = 100 \cdot 10^3$  MCS. In both panes,  $\langle \langle \gamma \rangle \rangle$  is estimated as  $\langle J_{c,m} \rangle - \langle J_{c,c} \rangle / 2$ , and the initial  $J$  values indicated by the dotted lines are such that  $\gamma = 0$ .

220 MCS. We performed competition experiments between two populations of cells,  
221 one adhering ( $\gamma = 6$ ) and one repelling ( $\gamma = -4$ ), to determine whether a strat-  
222 egy can invade in a population of cells using the other strategy. We first studied  
223 how the initial distribution of the two populations affects fitness after one season  
224 of  $30 \times 10^3$  MCS, when both populations have equal size  $N = 100$  cells. We  
225 compared a situation where the adhering cells are positioned in front of the re-  
226 pelling ones (Fig. 6a), with a situation where the positions of the two clusters is  
227 swapped (Fig. 6b). The distance from the peak at the end of the season (the fitness  
228 criterion) of a cluster of adhering cells is larger if they are hindered by a popula-  
229 tion of repelling cells in front of them. Next we incorporated in the competition  
230 experiments the fact that mutants invading a resident population are in small num-  
231 bers and furthest away from the new peak (because they are likely born from cells  
232 that replicate most, i.e. those closest to the previous location of the peak). We  
233 simulated repelling mutants invading adhering cells by placing a large cluster of  
234 adhering cells in front of a small group of repelling ones (Fig. 6c), and conversely,  
235 a small cluster of adhering cells invading a large group of repelling cells (Fig. 6d).  
236 In both cases, the resident population physically excludes the invading one from  
237 the path to resources, and thus the distance travelled by the invading population  
238 is limited. Taken together, these results show that there is interference compe-  
239 tition (i.e. direct competition due to displacement) between populations of cells  
240 with different strategies, which explains why the two strategies are meta-stable for  
241 intermediate season duration. This result may also provide a simple explanation  
242 for the fact that many unicellular organisms do not evolve multicellularity despite  
243 possessing the necessary adhesion proteins. Moreover, evolutionary bi-stability  
244 protects the multicellular strategy from evolutionary reversal to unicellularity over  
245 a large range of environmental conditions.

### 246 **3 Discussion**

247 We demonstrated that undifferentiated multicellularity can evolve in a cell-based  
248 model as a byproduct of an emergent collective integration of noisy spatial cues.  
249 Previous computational models have shown that multicellularity can be selected  
250 by reducing the death rate of cells in a cluster [17, 19], through social interaction  
251 [15, 40], by incorporating trade-offs between fitness and functional specialisation  
252 [41] or by allowing cells to exclude non-cooperating cells [42]. In these studies,

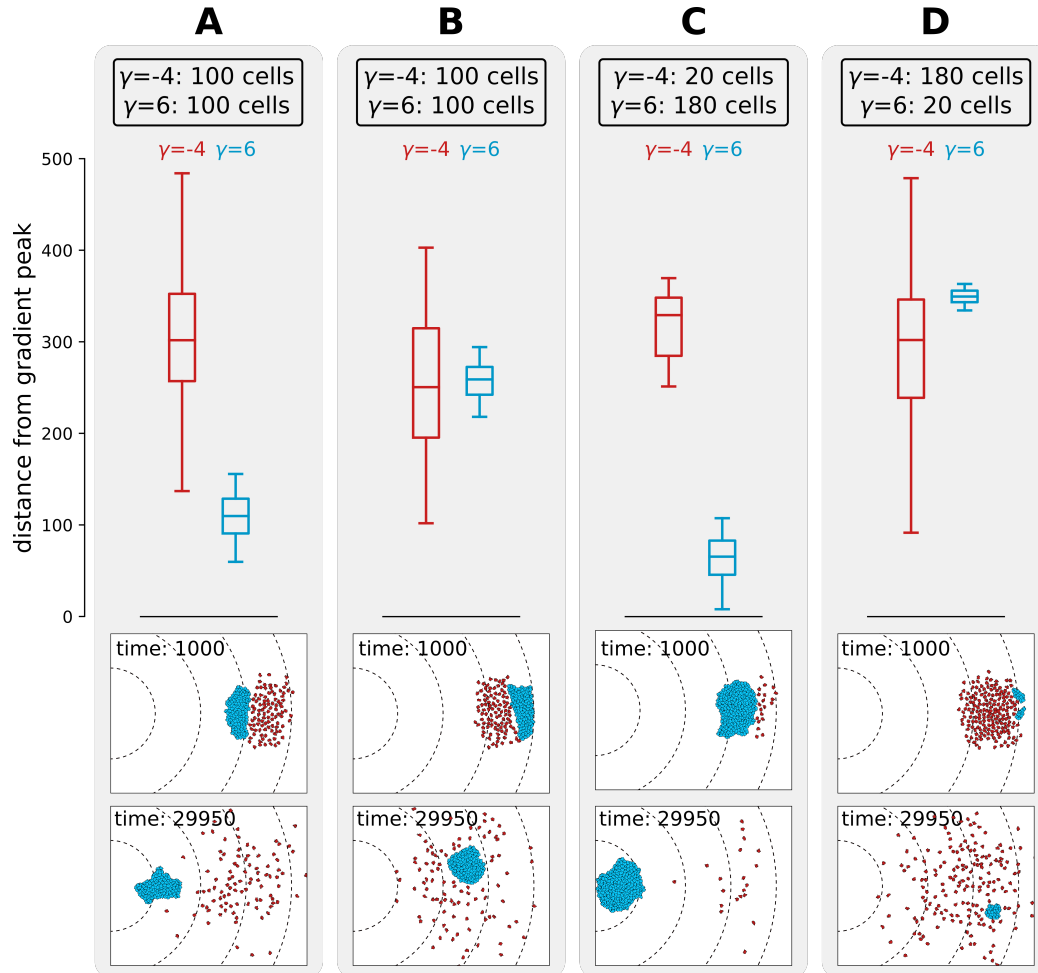

**Figure 6: Interference competition between adhering and repelling cells explains evolutionary bistability.** We let a simulation run for  $\tau_s = 30 \times 10^3$  MCS and then record the distance from the peak of the gradient, for two different populations of cells - one repelling (in red,  $\gamma = -4$ ) and one adhering (in blue,  $\gamma = 6$ ), for different initial conditions. The snapshots underneath are the initial and final spatial configurations of the cells on the grid. **A)** 100 adhering and 100 repelling cells, placed so that the adhesive ones are closer to the source of the gradient; **B)** 100 adhering and 100 repelling cells, placed so that the repelling cells are closer to the source of the gradient; **C)** 180 adhering and 20 repelling cells, placed so that the adhering cells are closer to the source of the gradient; **D)** 20 adhering and 180 repelling cells, placed so that the repelling cells are closer to the source of the gradient. Dashed lines in the snapshots are gradient isoclines.

253 direct selection for forming groups is incorporated by conferring higher fitness to  
254 the members of a cluster.

255 Earlier work found that multicellular structuring can emerge without direct se-  
256 lection when cells are destabilised by their internal molecular dynamics (e.g. the  
257 cell cycle) [43], or because of a toxic external environment [16]. In both cases,  
258 cell differentiation stabilises cell growth and arises as a consequence of physio-  
259 logical or metabolic trade-offs. Our work bears some similarity with these models  
260 because we do not explicitly incorporate a fitness benefit (or disadvantage) for be-  
261 ing in a group. Our results also show that division of labour - although important  
262 - is not a strict requirement for emergent aggregation. Furthermore, the simple  
263 nature of our model makes our results easily testable *in vitro*.

264 In many ways, the evolution of multicellularity can be compared to the evo-  
265 lution of collective dynamics. Previous studies on the evolution of herding be-  
266 haviour showed that aggregating strategies evolve in response to highly clumped  
267 food even though the pack explores the space slowly and inefficiently before find-  
268 ing food [44]. In our case, aggregation leads to a highly efficient search strategy,  
269 guided by long-range, albeit noisy, gradients. Moreover, modelling cells with  
270 an explicit shape and size (something largely neglected in models of multicellu-  
271 larity) allows for spatial self-organisation and generates interference competition  
272 between the unicellular and multicellular search strategies. The ensuing evolu-  
273 tionary bi-stability stabilises unicellularity despite these cells possessing the sur-  
274 face protein toolkit to adhere to each other, and prevents multicellular organisation  
275 from evolutionary reversal into single cells (over a range of environmental condi-  
276 tions). The “automatic” outcome of spatial self-organisation provides an initial,  
277 non-genetic robustness, which can be further stabilised by later adaptations [45].

278 The driver for the evolution of adhesion in our model is (emergent) collective  
279 chemotaxis. This is reminiscent of the aggregate phase of the life cycle of *Dic-  
280 tyostelium discoideum* [21], in that a cluster of cells moves directionally as a unit  
281 following light or temperature, while individual cells are incapable of identifying  
282 the correct direction of motion. There are some important differences between  
283 our model and *Dictyostelium*, however. Individual cells are able to sense the  
284 chemotactic signal in our model, albeit inefficiently, and information about the

285 direction of the gradient is transmitted mechanically within cell clusters. In *Dic-*  
286 *tyostelium*, individual cells cannot perceive light and thermal cues: photo- and  
287 thermo-taxis are coordinated by waves of cAMP secretion that travel through the  
288 slug. The lack of extra chemical cues to organise movement within a cell cluster  
289 in our model makes for a simpler scenario without large-scale transmission of in-  
290 formation throughout the aggregate. Nevertheless, computational modelling has  
291 shown that long-range chemical signaling coupled to cells' differential adhesion  
292 suffices to reproduce *Dictyostelium*'s life-cycle [26, 46]. Combining that with our  
293 evolutionary framework would likely enrich our understanding of *Dictyostelium*  
294 evolution towards partial multicellularity.

295 Our model of collective movement is an example of the “many wrongs” prin-  
296 ciple [33]: the direction error of each cell is corrected by the interactions with  
297 the other cells in the cluster. We adopted the Cellular Potts Model to model cells  
298 because it allowed for a straightforward implementation of the evolvable receptor-  
299 ligand system. Several other models of cell clusters and collective chemotaxis  
300 have been proposed ([30, 32]), in some cases displaying chemotaxis in qualita-  
301 tively different ways (for instance without sensing the chemokine gradient, only its  
302 concentration [47]). We hypothesise that the evolutionary mechanism described  
303 here are independent of the particular cell model choice, and thus would also work  
304 with other models discussed in [30], provided that cells were able to polarise or  
305 move also in the absence of other cells.

306 The importance of a bottom-up approach to study the evolution of multicellu-  
307 larity has been repeatedly emphasised [48, 49], and a broader understanding of  
308 cells self-organisation and evolution may have applications to clinically relevant  
309 multiscale evolutionary problems, such as the evolution of collective metastatic  
310 migration of cancer cells [50–53]. Our work highlights that the properties of sin-  
311 gle cells emergently give rise to novel properties of cell clusters. These novel  
312 properties - in a downward causative direction - generate the selection pressure to  
313 form the first undifferentiated multicellular groups.

## 314 **4 Model**

315 We model an evolving population of cells that migrate and perform chemotaxis  
316 on a 2-dimensional lattice. Cell-cell interactions and movements are modelled  
317 with the Cellular Potts Model (CPM) [34, 35]. The evolutionary dynamics (mu-  
318 tations and selection) are implemented assuming constant population size. Cells  
319 undergo fitness-dependent reproduction after every season which lasts  $\tau_s$  Monte  
320 Carlo Steps of the CPM algorithm, and then the population is culled back to its  
321 original size. After this, environmental conditions are changed and a new season  
322 begins.

### 323 **4.1 Cell dynamics**

324 The model is a hybrid Cellular Potts Model implemented with the Tissue Sim-  
325 ulation Toolkit [36]. A population of  $N$  cells exists on a regular square lattice  
326  $\Lambda_1 \subset \mathbb{Z}^2$ . The chemotactic signal is located on a second plane  $\Lambda_2$ , of the same size  
327 and spacing as  $\Lambda_1$ . A cell  $c$  consists of the set of (usually connected) lattice sites  
328  $\vec{x} \in \Lambda_1$  to which the same spin  $s$  is assigned, i.e.  $c(s) = \{\vec{x} \in \Lambda_1 \mid \sigma(\vec{x}) = s\}$ .

329 The time dynamics are modelled as a Monte Carlo simulation. The algo-  
330 rithm attempts to copy the spin value  $\sigma(\vec{x})$  of a randomly chosen lattice site  $\vec{x}$  to  
331 a site  $\vec{x}'$  in its Moore neighbourhood. One Monte Carlo Step (MCS) consists of  
332  $L$  attempted copying events, with  $V^2 = |\Lambda_1|$  (the size of the lattice, and  $V$  one of  
333 its dimensions on a regular square lattice). Whether an attempted spin copy is ac-  
334 cepted depends on the contribution of several terms to the energy  $H$  of the system,  
335 as well as other biases  $Y$  (explained in detail below). A copy is always accepted  
336 if energy is dissipated, i.e. if  $\Delta H + Y < 0$  (with  $\Delta H = H_{\text{after copy}} - H_{\text{before copy}}$ ),  
337 and may be accepted if  $\Delta H + Y \geq 0$  because of “thermal” fluctuations following  
338 a Boltzmann distribution:

$$P(\Delta H, Y) = e^{-\frac{\Delta H + Y}{T}}$$

339 with  $T > 0$  the temperature of the system, determining the probability of the fluc-  
340 tuations. The Hamiltonian  $H$  of the system consists of two terms, corresponding  
341 to adhesion and size constraint:

$$H = H_{\text{adhesion}} + H_{\text{cell size}}$$



342 The copy biases, or “work terms”,  $Y$  consist of terms corresponding to cell mi-  
 343 gration and chemotaxis:

$$Y = Y_{\text{migration}} + Y_{\text{chemotaxis}}$$

344 **Cell adhesion** Adhesion between cells and to medium contribute to the Hamil-  
 345 tonian as:

$$H_{\text{adhesion}} = \sum_{(\vec{x}, \vec{x}')} J(\sigma(\vec{x}), \sigma(\vec{x}')) (1 - \delta(\sigma(\vec{x}), \sigma(\vec{x}')))$$

346 where the sum is carried out over all the neighbour pairs  $(\vec{x}, \vec{x}')$ , and  $\delta(\sigma(\vec{x}), \sigma(\vec{x}'))$   
 347 is the Kronecker delta which restricts the energy calculations to the interface be-  
 348 tween two cells, or a cell and medium.

349 In order to calculate the values of  $J(\sigma(\vec{x}), \sigma(\vec{x}'))$ , we assume that cells  
 350 express ligand and receptor proteins on their surface. Ligands and receptors are  
 351 modelled as binary strings of fixed length  $\nu$  (Fig. 1, inspired by [37]). Two cells  
 352 adhere more strongly (experience lower  $J$  values) when their receptors  $R$  and  
 353 ligands  $L$  are more complementary, i.e. when the Hamming distance  $D(R, L) =$   
 354  $\sum_{i=1}^{\nu} \delta(R_i, L_i)$  between them is larger. Thus, given two cells with spin values  $\sigma_1$   
 355 and  $\sigma_2$  and their corresponding pairs of receptors and ligands  $(R(\sigma_1), L(\sigma_1))$  and  
 356  $(R(\sigma_2), L(\sigma_2))$ :

$$J(\sigma_1, \sigma_2) = J_{\alpha} + 2\nu - D(R(\sigma_1), L(\sigma_2)) - D(R(\sigma_2), L(\sigma_1))$$

357 with  $J_{\alpha} = 4$  chosen so that the final calculation yields values for  $J(\sigma_1, \sigma_2)$  in the  
 358 interval  $[4, 52]$ .

359 Adhesion of a cell with medium is assumed to depend only on the cell  
 360 (the medium is inert), and in particular it depends only on a subset of the ligand  
 361 proteins of a cell. This subset consists of the substring of  $L$  which begins at the  
 362 initial position of  $L$  and has length  $\nu'$ . The value of  $J(\sigma_1, \sigma_{\text{medium}})$  is calculated  
 363 as:

$$J(\sigma_1, \sigma_{\text{medium}}) = J'_{\alpha} + \sum_{i=1}^{\nu'} F(i)L_i$$

364 with  $J'_{\alpha} = 8$  and  $F(i)$  a piece-wise defined function (a lookup table). The  $J$  values  
 365 range in the interval  $[8, 20]$ .

366        Encoding the energy values for cell adhesion in terms of receptor-ligand  
367 binding allows for some flexibility and redundancy. Two cells that have the same  
368 receptors and ligands (i.e. given  $R(\sigma_1), L(\sigma_1)$  and  $R(\sigma_2), L(\sigma_2)$  with  $R(\sigma_1) =$   
369  $R(\sigma_2)$  and  $L(\sigma_1) = L(\sigma_2)$ ) can adhere with any strength (or not at all), by virtue  
370 of the particular receptor and ligand combination. Finally, implementing receptors  
371 and ligands in terms of binary strings allows for a simple evolutionary scheme,  
372 where mutations consist of random bit-flipping (more on this below). The nu-  
373 merical values of the various constants are chosen with two criteria in mind: the  
374 receptor-ligand system has to be long enough that many different combinations  
375 are possible, so that its evolution is more open ended; and two cells with random  
376 receptors and ligands do not (on average) adhere preferentially to each other or to  
377 the medium.

378        **Cell size constraint** Cell size  $A(c) = |c(s)|$ , the number of lattice sites that  
379 compose a cell, is assumed to remain close to a target size  $A_T$  (equal for all cells).  
380 This is achieved by adding an energy constraint in the Hamiltonian that penalises  
381 cell sizes that are much larger or smaller than  $A_T$ :

$$H_{\text{cell size}} = \sum_{c \in C} \lambda (A(c) - A_T)^2$$

382 with  $C$  the set of cells and  $\lambda$  a scaling factor for cell stiffness.

383        **Cell migration** We assume that each cell  $c \in C$  preferentially migrates to-  
384 wards a target direction given by a vector  $\vec{p}(c)$  (following [54]). Lattice site copies  
385 of a cell are energetically more favourable when they are closer to the direction of  
386 that cell's  $\vec{p}$ :

$$Y_{\text{migration}} = -\mu_p \cos(\theta_p)$$

387 Where  $\mu_p$  is the maximum energy contribution given by migration, and  $\theta_p$  is the  
388 angle between  $\vec{p}$  and the vector that extends from the center of mass of the cell  
389 to the lattice site into which copying is attempted. Every  $\tau_p$  MCS the vector  $\vec{p}$   
390 is updated: its new value is the vector corresponding to the actual direction of  
391 motion of the cell over the past  $\tau_p$  MCS (scaled to unit) (Fig. 1). Note that all cells  
392 have the same  $\tau_p$ , but their initial moment of updating is randomised so that they  
393 do not update all at the same time.

394       **Chemotaxis** Individual cells are able to migrate towards the perceived direc-  
395 tion of a chemokine gradient. The slope of the gradient is very shallow, making it  
396 difficult to perceive the direction over the typical length of a cell. Moreover, sev-  
397 eral sources of noise are introduced: cell’s sampling error due to small size, noise  
398 due to integer approximation, and noise due to random absence of the signal.

399       The chemotactic signal is implemented as a collection of integer values on  
400 a second two dimensional lattice ( $\Lambda_2 \subset \mathbb{Z}^2$ , with the same dimensions as the CPM  
401 lattice). The (non-negative) value of a lattice site represents the local amount of  
402 chemotactic gradient. This value remains constant for the duration of one season  
403 ( $\tau_s$  MCS). The amount of chemotactic signal  $\chi$  is largest at the peak, which is  
404 located at the center of one of the lattice boundaries, and from there decays lin-  
405 early in all directions, forming a gradient:  $\chi(d) = 1 + (k_\chi/100)(V - d)$ , where  
406  $k_\chi$  is a scaling constant,  $d$  is the Euclidean distance of a lattice site from the peak  
407 of the gradient, and  $V$  is the distance between the source of the gradient and the  
408 opposite lattice boundary;  $V = \sqrt{|\Lambda_1|}$  for a square lattice. Non integer values of  
409  $\chi$  are changed to  $\lceil \chi \rceil$  (the smallest integer larger than  $\chi$ ) with probability equal to  
410  $\lceil \chi \rceil - \chi$ , otherwise they are truncated to  $\lfloor \chi \rfloor$  (the largest integer smaller than  $\chi$ ).  
411 Moreover, the value of  $\chi$  is set to zero with probability  $p_{\chi=0}$  to create ”holes” in  
412 the gradient.

413       A cell has limited knowledge of the gradient, as it only perceives the chemo-  
414 tactic signal on the portion of  $\Lambda_2$  corresponding to the cell’s occupancy on  $\Lambda_1$ . We  
415 define the vector  $\vec{\chi}(c)$  as the vector that spans from the cell’s center of mass to the  
416 center of mass of the perceived gradient. Copies of lattice sites are favoured when  
417 they align with the direction of the vector  $\vec{\chi}(c)$ , i.e. when there is a small angle  $\theta_c$   
418 between  $\vec{\chi}(c)$  and the vector that spans from the center of mass of the cell to the  
419 lattice site into which copying is attempted (Fig. 1):

$$Y_{\text{chemotaxis}} = -\mu_\chi \cos(\theta_c)$$

420       Where  $\mu_\chi$  is the maximal propensity to move along the perceived gradient. A  
421 uniform random  $\theta_c \in [0, 2\pi[$  is chosen whenever  $|\vec{\chi}(c)| = 0$ , i.e. when, locally,  
422 there is no gradient (which may happen for very shallow gradients).

## 423 **4.2 Evolutionary dynamics**

424 A population of  $N$  cells undergoes the cell dynamics described above for the dura-  
425 tion of a season, i.e.  $\tau_s$  MCS. At the end of the season the evolutionary dynamics  
426 take place. The evolutionary dynamics are decoupled from the cell dynamics for  
427 the sake of simplicity, and consist of fitness evaluation, cell replication with mu-  
428 tation, and cell death to enforce constant population size.

429 **Fitness evaluation** Fitness - i.e. the probability of replication - is calculated  
430 at the end of each season for each cell. We do not include any explicit advantage  
431 or disadvantage due to multicellularity, and instead assume that fitness is based  
432 only on individual properties of the cells. Therefore, any multicellular behaviour  
433 is entirely emergent in this simulation.

434 The fitness  $F(c)$  of a cell  $c \in C$  depends on the distance  $d = d(c)$  of the center  
435 of mass of a cell  $c$  from the peak of the gradient as a sigmoid function which is  
436 maximal when  $d = 0$ , and decreases rapidly for larger values of  $d$ :

$$F(c) = \frac{1}{1 + \left(\frac{h_d}{d}\right)^2}$$

437 with  $h_d$  being the distance at which  $F(c) = 1/2$ .

438 **Replication** For each cell  $i \in C$  with fitness  $F(i)$ , the probability of repli-  
439 cating is  $P(\text{cell } i \text{ replicates}) = F(i) / \sum_{c \in C} F(c)$ . We allow for  $N$  replication  
440 events, each calculated with the same probabilities, choosing only cells that were  
441 already present in the previous season (so not their offspring). Cells with larger  
442 fitness may be chosen multiple times for replication.

443 Each replicating cell divides along its short axis to create a daughter cell (see  
444 e.g. [37]), ensuring that related cells start close to each other at the beginning of  
445 the new season. One of the two cells (chosen randomly) is considered the mother  
446 cell, and can re-enter the competition for replication, the other cell may undergo  
447 mutations in their receptor and ligand composition. The bitstrings of the receptor  
448 and ligand may be modified with a per-position probability  $\mu_{R,L}$ . Mutations flip  
449 individual bits (from 0 to 1, and vice versa).

450 Because repeatedly halving a cell's area would quickly lead to very small  
451 cells, we run a small number  $\eta$  of steps of the cell dynamics (without cell migra-  
452 tion and chemotaxis) between two replication events that affect the same cell, so  
453 that cells can grow back to target size.

454 **Death** After replication, there are  $2N$  cells on the lattice. In order to restore  
455 the initial population size  $N$ , half of the cells are removed from the lattice at ran-  
456 dom. When the initial population size is restored, the season ends. The new season  
457 begins by randomly placing the peak of a new gradient at the mid-way point of a  
458 randomly chosen boundary (different from the previous one). The remaining cells  
459 will then undergo the cell dynamics for the following  $\tau_s$  MCS.

## 460 **5 Acknowledgment**

461 We thank Paulien Hogeweg for constructive discussion. This research is sup-  
462 ported by the Origins Center (NWA startimpuls). All authors declare no conflict  
463 of interest.

## 464 **6 Author Contributions**

465 ESC and RMAV conceived the study. ESC, RMAV, RMHM developed the model.  
466 ESC ran the simulations, analysed the data and wrote the first draft of the manuscript.  
467 ESC, RMAV, RMHM interpreted the results and wrote the final manuscript.

**Table 1: Parameters**

| <b>Parameter</b>                     | <b>explanation</b>                                         | <b>Values</b>                         |
|--------------------------------------|------------------------------------------------------------|---------------------------------------|
| $V^2$                                | lattice size                                               | $500 \times 500$ pix                  |
| $T$                                  | Boltzmann temperature                                      | 16 AUE                                |
| $\lambda$                            | cell stiffness                                             | 5.0 AUE/pix <sup>2</sup>              |
| $A_T$                                | cell targetarea                                            | 50 pix                                |
| <i>Cell adhesion</i>                 |                                                            |                                       |
| $J_\alpha$                           | minimum J value between cells                              | 4 AUE/[pix length]                    |
| $J'_\alpha$                          | minimum J value between cell and medium                    | 8 AUE/[pix length]                    |
| $\nu$                                | length of receptor and ligand bitstring                    | 24 bits                               |
| $\nu'$                               | length ligand bitstring for medium adhesion                | 6 bits                                |
| <i>Cell migration and chemotaxis</i> |                                                            |                                       |
| $\mu_p$                              | strength of persistent migration                           | 3.0 AUE                               |
| $\tau_p$                             | duration of persistence vector                             | 50 MCS                                |
| $\mu_\chi$                           | strength of chemotaxis                                     | 1.0 AUE                               |
| $k_\chi$                             | scaling factor chemokine gradient                          | 1.0 molecules/[pix length]            |
| $p_{\chi=0}$                         | probability of zero value ('hole') in gradient             | $0.1 \text{ pix}^{-1}$                |
| <i>Evolution</i>                     |                                                            |                                       |
| $N$                                  | population size                                            | 200 cells                             |
| $\tau_s$                             | duration of season                                         | $5 \times 10^3 - 150 \times 10^3$ MCS |
| $h_d$                                | distance from gradient peak where fitness is $\frac{1}{2}$ | 50 [pix length]                       |
| $\mu_{R,L}$                          | receptor and ligand mutation probability                   | 0.01 per bit, per replication         |

AUE: Arbitrary Units of Energy (see Hamiltonian in Model Section); pix: unit of area (one pixel of the lattice); pix length: unit of distance; MCS: Monte Carlo Step (unit of time).

468 **Supplementary Material of:**  
469 **Collective integration of spatial information drives the**  
470 **evolution of multicellularity**

471 **S1 Indistinguishable relative movement of cells with**  
472 **and without a chemotactic gradient**

473 Here we investigate whether cells in a cluster move differently when they are  
474 performing chemotaxis or not. Fig. S1.1 shows the flow field around moving cells  
475 in a cluster with or without a gradient, as devised by [29]. In short, the flow field  
476 is calculated by taking each cell as a reference, and then rotating all other cells  
477 and their displacement vectors such that the reference cell displacement points to  
478 the right ( $\vec{d} = \begin{bmatrix} x \\ 0 \end{bmatrix}$ ). Then the rotated displacement vectors are summed in bins at  
479 defined points in the neighbourhood (using all the cells as a reference, and using  
480 different time points) to obtain the average displacements in the neighbourhood  
481 [29]. In this case, the flow field shows that the relative movement of cells in a  
482 cluster is the same whether there is a gradient or not.

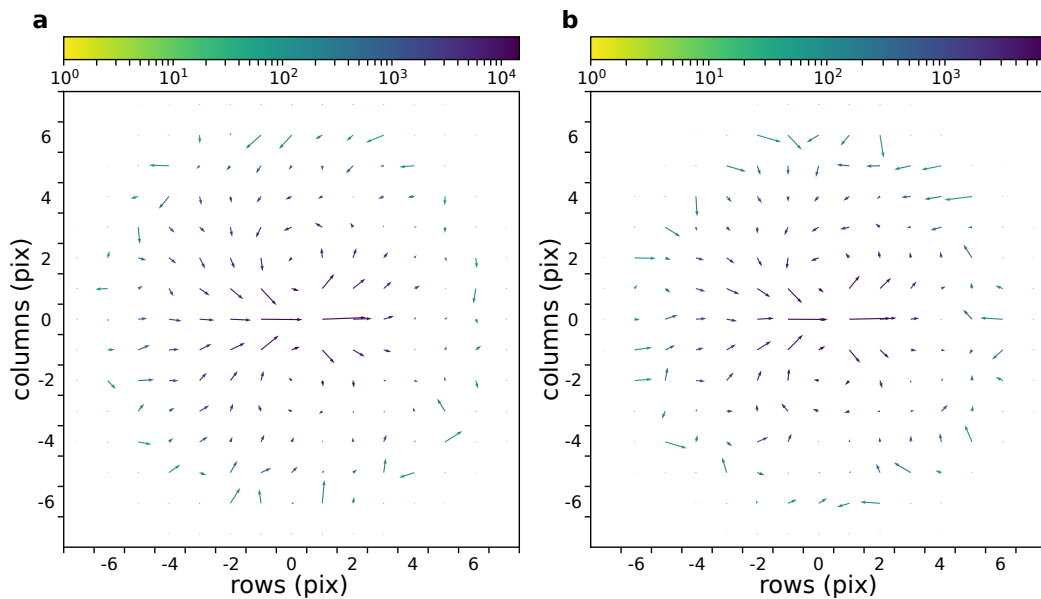

**Figure S1.1:** The flow field of a cluster of cells with and without gradient. **a** With chemokine gradient. **b** Without chemokine gradient. In both cases  $N = 50$  cells with  $\gamma = 6$  are placed at the center of the field (All other parameters as in main text).



483 **S2 Chemotaxis with short persistence of migration**  
484 **and small persistence strength**

485 Fig. S2.2 shows that chemotaxis occurs in a rigid cluster of strongly adhering  
486 cells. The lower persistence strength reduces the number of changes in the relative  
487 position of cells within the cluster.

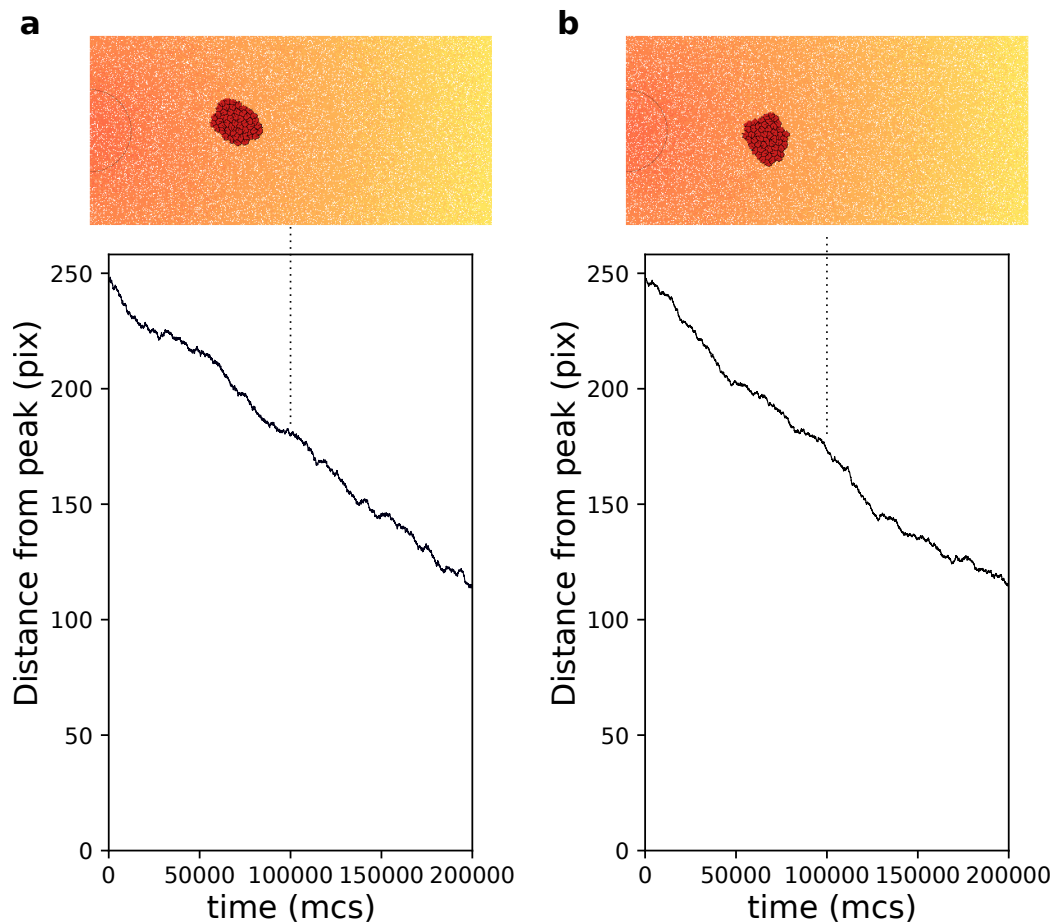

**Figure S2.2:** Chemotaxis of a rigid cluster. **a**  $\tau_p = 5$ . **b**  $\mu_p = 0.5$ . In both cases  $N = 50$  cells with  $\gamma = 6$  are placed on the right of the field and move towards higher concentration of the gradient (the semicircle indicates the resource location, where the gradient is highest. All other parameters as in main text).

### 488 **S3 Extraction of straight segments from cell tracks**

489 For the contour plots in Fig.3 of the main text, we extracted straight segments of  
490 the cells' trajectories, then measured the length of this segment and its angle with  
491 the direction of the source of the gradient. To identify these straight segments,  
492 we take increasingly longer intervals between the recorded cell positions, and  
493 measure how far the intermediate data points are positioned from the line spanning  
494 these two data points (Fig. S3.3A). As soon as one of the data points has a distance  
495 greater than a threshold, we stop extending the interval and continue from the  
496 cell position at which the chosen segment ends (the threshold value is set to 3  
497 pixel lengths; this value is chosen because it is the largest integer smaller than  
498 the average cell radius, given a cell area = 50 pix). In figure S3.3B, the resulting  
499 segments are superimposed on cell position data from two simulations: one with  
500 a single cell and one with a cluster of adhering cells. While the overlap between  
501 the segment and the track itself varies, the length and orientation of the straight  
502 parts of the track are generally well-preserved in the segments.

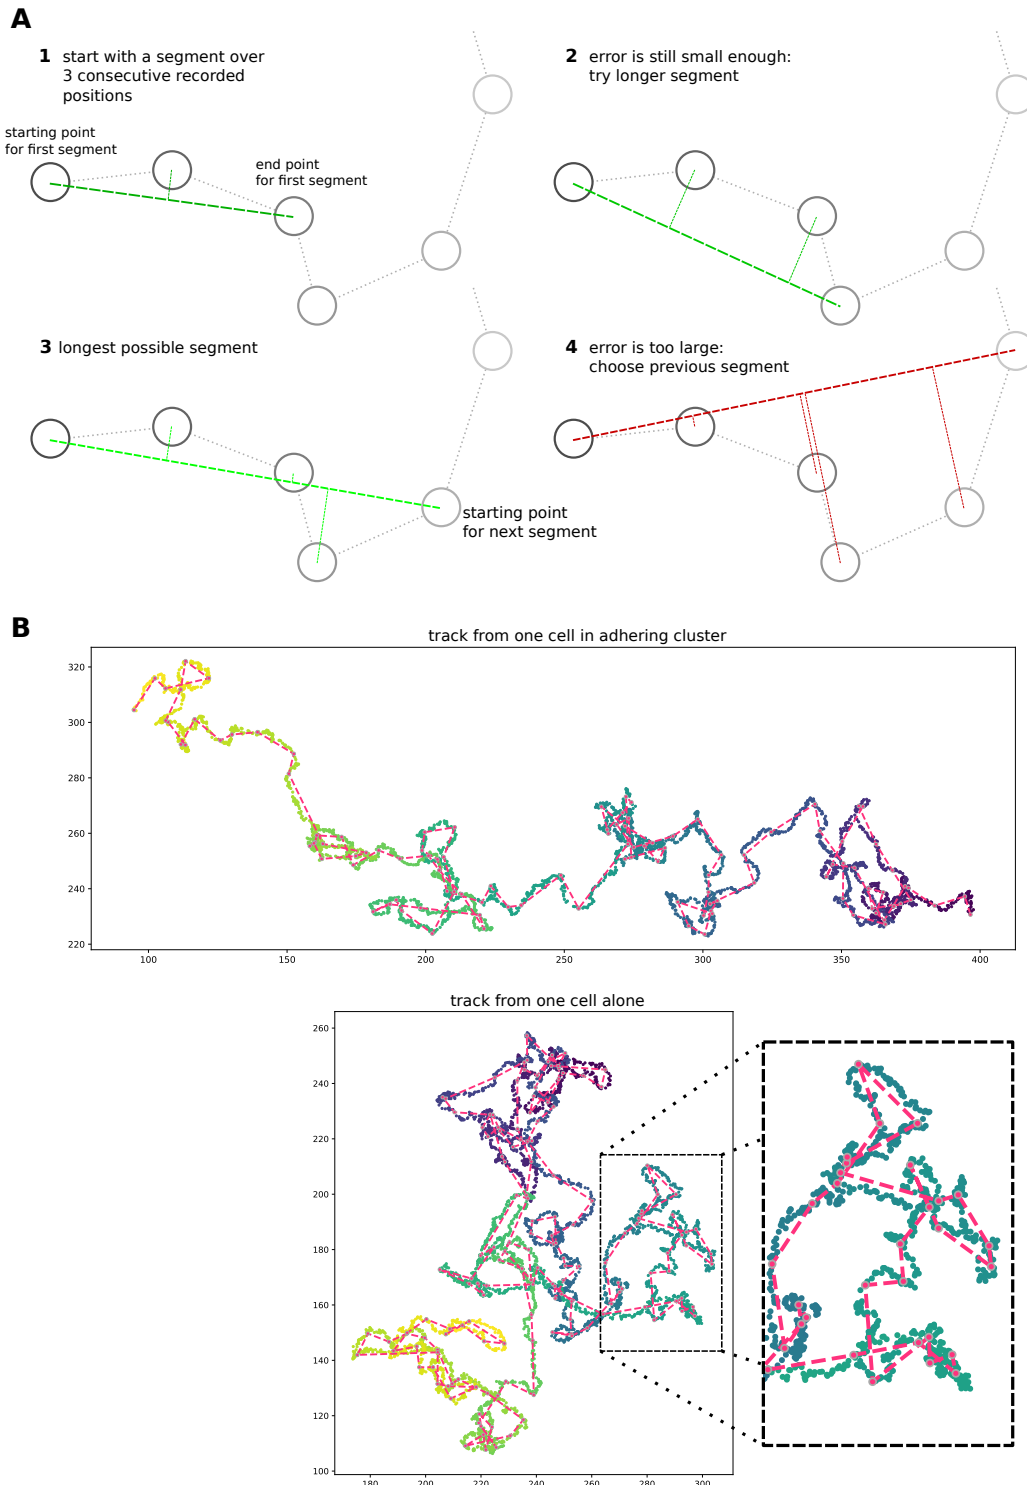

**Figure S3.3: Simple algorithm for segment extraction** a) Visual explanation of the algorithm, with a cartoon representation of a cell track with cell positions recorded at regular time intervals. Images 1-4 represent subsequent stages of the algorithm. For 1-3, the maximum distance of intermediate cell positions is still small enough, while for the segment in image 4 two intermediate positions are too far away. So the segment in image 3 will be used in the analysis, and we will start the algorithm from the fourth data point. b) Two cell tracks from simulations, with the extracted segments superimposed in red.

## 503 S4 Chemotaxis of cells with different $A_T$

504 We explored the behaviour of different cell sizes and cell number by running sim-  
505 ulations where the total area of the cells is kept constant,  $NA_T = 5000$ . We  
506 expect that large cells move with greater persistence towards the peak of the gra-  
507 dient than small cells, because they perceive a larger portion of the gradient, thus  
508 averaging out noise. Indeed, Fig. S4.4 shows that larger cells perform chemotaxis  
509 more efficiently than smaller cells, given the same chemotactic gradient.

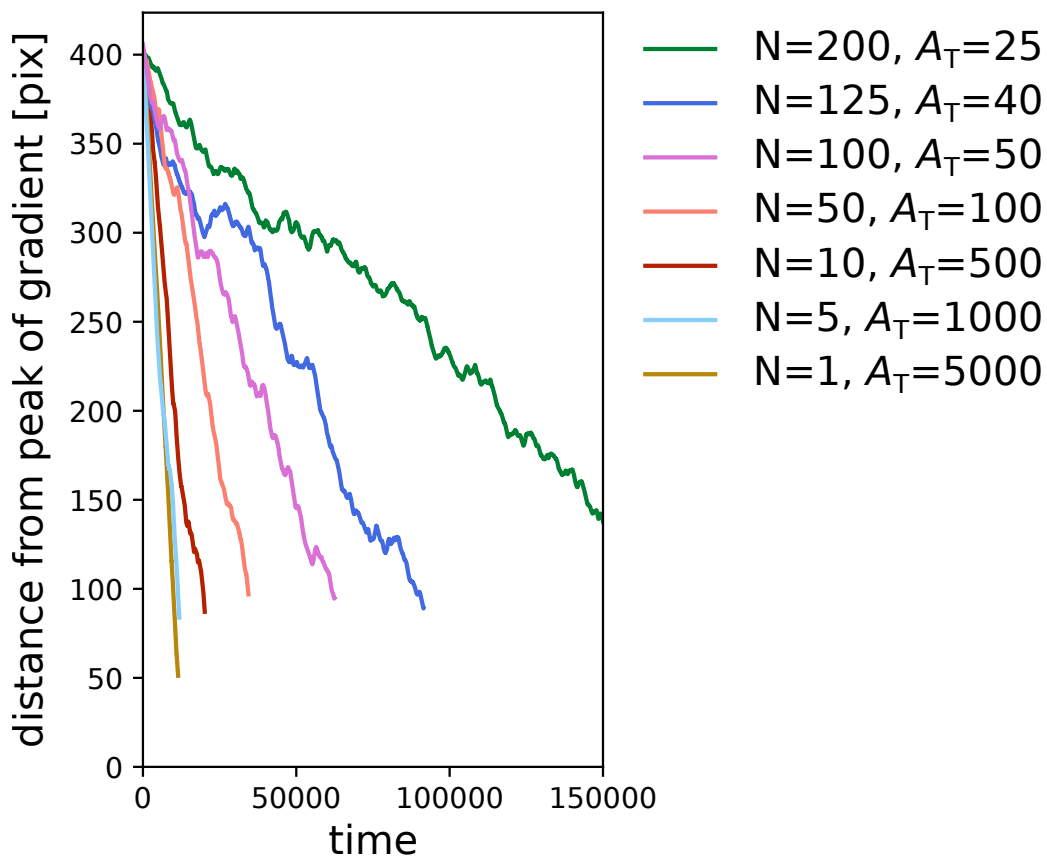

**Figure S4.4:** Large cells perform chemotaxis more efficiently than clusters of small cells. Each line corresponds to one simulation with a given combination of number of cells  $N$  and cell size  $A_T$ , and shows the distance of the centre of mass of the cluster of cells from the peak of the gradient over time. We kept the total volume of the cells constant in all simulations (i.e.  $NA_T = 5000$ ). All other parameters (including the chemotactic signal) are the same as in main text.

## 510 **S5 Supplementary videos**

- 511 1. Migrating cluster of adhering cells. Cell colour indicates the direction of  
512 migration, to emphasize the dynamics within the cluster.
- 513 2. The same cluster of adhering cells. All cells have the same colour to show  
514 how the migration of the cluster as a whole resembles that of an amoeba.
- 515 3. Video of an evolutionary simulation, starting with neutrally adhering cells  
516 ( $\gamma = 0$ ). The season changes every  $100 * 10^3$  MCS.

## 517 **References**

- 518 [1] Leo W Buss. *The evolution of individuality*, volume 796. Princeton Univer-  
519 sity Press, 2014.
- 520 [2] John Maynard Smith and Eors Szathmary. *The major transitions in evolu-*  
521 *tion*. Oxford, UK: WE Freeman, 1995.
- 522 [3] Richard K Grosberg and Richard R Strathmann. The evolution of multice-  
523 lularity: a minor major transition? *Annu. Rev. Ecol. Evol. Syst.*, 38:621–654,  
524 2007.
- 525 [4] Laura Wegener Parfrey and Daniel JG Lahr. Multicellularity arose sev-  
526 eral times in the evolution of eukaryotes (response to doi 10.1002/bies.  
527 201100187). *Bioessays*, 35(4):339–347, 2013.
- 528 [5] Andrew H Knoll. The multiple origins of complex multicellularity. *Annual*  
529 *Review of Earth and Planetary Sciences*, 39:217–239, 2011.
- 530 [6] Martin E Boraas, Dianne B Seale, and Joseph E Boxhorn. Phagotrophy by  
531 a flagellate selects for colonial prey: a possible origin of multicellularity.  
532 *Evolutionary Ecology*, 12(2):153–164, 1998.
- 533 [7] William C Ratcliff, R Ford Denison, Mark Borrello, and Michael Trav-  
534 isano. Experimental evolution of multicellularity. *Proceedings of the Na-*  
535 *tional Academy of Sciences*, 109(5):1595–1600, 2012.

- 536 [8] Qingyou Du, Yoshinori Kawabe, Christina Schilde, Zhi-hui Chen, and  
537 Pauline Schaap. The evolution of aggregative multicellularity and cell–cell  
538 communication in the dictyostelia. *Journal of molecular biology*, 427(23):  
539 3722–3733, 2015.
- 540 [9] D Kaiser, C Manoil, and M Dworkin. Myxobacteria: Cell interactions, ge-  
541 netics, and development. *Annual Review of Microbiology*, 33(1):595–639,  
542 1979. doi: 10.1146/annurev.mi.33.100179.003115. PMID: 115383.
- 543 [10] Nicole King. The unicellular ancestry of animal development. *Developmen-  
544 tal Cell*, 7(3):313 – 325, 2004. ISSN 1534-5807.
- 545 [11] Antonis Rokas. The molecular origins of multicellular transitions. *Current  
546 opinion in genetics & development*, 18(6):472–478, 2008.
- 547 [12] Simon E Prochnik, James Umen, Aurora M Nedelcu, Armin Hallmann,  
548 Stephen M Miller, Ichiro Nishii, Patrick Ferris, Alan Kuo, Therese Mitros,  
549 Lillian K Fritz-Laylin, et al. Genomic analysis of organismal complexity  
550 in the multicellular green alga *volvox carteri*. *Science*, 329(5988):223–226,  
551 2010.
- 552 [13] Daniel J Richter, Parinaz Fozouni, Michael B Eisen, and Nicole King. Gene  
553 family innovation, conservation and loss on the animal stem lineage. *Elife*,  
554 7:e34226, 2018.
- 555 [14] Thomas Garcia, Leonardo Gregory Brunnet, and Silvia De Monte. Differ-  
556 ential adhesion between moving particles as a mechanism for the evolution  
557 of social groups. *PLoS computational biology*, 10(2):e1003482, 2014.
- 558 [15] Jaideep Joshi, Iain D Couzin, Simon A Levin, and Vishweshha Guttal. Mo-  
559 bility can promote the evolution of cooperation via emergent self-assortment  
560 dynamics. *PLoS computational biology*, 13(9):e1005732, 2017.
- 561 [16] Salva Duran-Nebreda, Adriano Bonforti, Raúl Montanez, Sergi Valverde,  
562 and Ricard Solé. Emergence of proto-organisms from bistable stochastic  
563 differentiation and adhesion. *Journal of The Royal Society Interface*, 13  
564 (117):20160108, 2016.

- 565 [17] Merlijn Staps, Jordi van Gestel, and Corina E Tarnita. Emergence of diverse  
566 life cycles and life histories at the origin of multicellularity. *Nature ecology  
567 & evolution*, 3(8):1197–1205, 2019.
- 568 [18] Eric Libby, William Ratcliff, Michael Travisano, and Ben Kerr. Geometry  
569 shapes evolution of early multicellularity. *PLoS computational biology*, 10  
570 (9):e1003803, 2014.
- 571 [19] Yuriy Pichugin, Jorge Peña, Paul B Rainey, and Arne Traulsen. Fragmenta-  
572 tion modes and the evolution of life cycles. *PLoS computational biology*, 13  
573 (11):e1005860, 2017.
- 574 [20] Yuanxiao Gao, Arne Traulsen, and Yuriy Pichugin. Interacting cells driving  
575 the evolution of multicellular life cycles. *PLoS computational biology*, 15  
576 (5):e1006987, 2019.
- 577 [21] Pauline Schaap. Evolutionary crossroads in developmental biology: Dic-  
578 tyostelium discoideum. *Development*, 138(3):387–396, 2011.
- 579 [22] Dale Kaiser. Coupling cell movement to multicellular development in  
580 myxobacteria. *Nature Reviews Microbiology*, 1(1):45, 2003.
- 581 [23] Carolyn L Smith, Thomas S Reese, Tzipe Govezensky, and Rafael A Barrio.  
582 Coherent directed movement toward food modeled in trichoplax, a ciliated  
583 animal lacking a nervous system. *Proceedings of the National Academy of  
584 Sciences*, 116(18):8901–8908, 2019.
- 585 [24] Cornelis J Weijer. Collective cell migration in development. *Journal of cell  
586 science*, 122(18):3215–3223, 2009.
- 587 [25] Peter Friedl and Darren Gilmour. Collective cell migration in morphogene-  
588 sis, regeneration and cancer. *Nature reviews Molecular cell biology*, 10(7):  
589 445, 2009.
- 590 [26] Athanasius FM Maree, Alexander V Panfilov, and Paulien Hogeweg. Photo-  
591 taxis during the slug stage of dictyostelium discoideum: a model study. *Pro-  
592 ceedings of the Royal Society of London B: Biological Sciences*, 266(1426):  
593 1351–1360, 1999.

- 594 [27] Balint Szabo, GJ Szöllösi, B Gönci, Zs Jurányi, David Selmecki, and Tamás  
595 Vicsek. Phase transition in the collective migration of tissue cells: experi-  
596 ment and model. *Physical Review E*, 74(6):061908, 2006.
- 597 [28] Alexandre J Kabla. Collective cell migration: leadership, invasion and seg-  
598regation. *Journal of The Royal Society Interface*, 9(77):3268–3278, 2012.
- 599 [29] A Szabó, R Ünneper, E Méhes, W O Twaal, W S Argraves, Y Cao, and  
600 A Cziráok. Collective cell motion in endothelial monolayers. *Physical Bi-*  
601 *ology*, 7(4):046007, nov 2010.
- 602 [30] Brian A Camley and Wouter-Jan Rappel. Physical models of collective cell  
603 motility: from cell to tissue. *Journal of physics D: Applied physics*, 50(11):  
604 113002, 2017.
- 605 [31] Mishel George, Francesco Bullo, and Otger Campàs. Connecting individual  
606 to collective cell migration. *Scientific reports*, 7(1):1–10, 2017.
- 607 [32] Brian A Camley. Collective gradient sensing and chemotaxis: modeling  
608 and recent developments. *Journal of Physics: Condensed Matter*, 30(22):  
609 223001, 2018.
- 610 [33] Andrew M. Simons. Many wrongs: the advantage of group navigation.  
611 *Trends in Ecology & Evolution*, 19(9):453 – 455, 2004. ISSN 0169-5347.
- 612 [34] François Graner and James A. Glazier. Simulation of biological cell sorting  
613 using a two-dimensional extended potts model. *Phys. Rev. Lett.*, 69:2013–  
614 2016, Sep 1992.
- 615 [35] James A. Glazier and François Graner. Simulation of the differential adhe-  
616 sion driven rearrangement of biological cells. *Phys. Rev. E*, 47:2128–2154,  
617 Mar 1993. doi: 10.1103/PhysRevE.47.2128.
- 618 [36] Josephine T. Daub and Roeland M. H. Merks. *Cell-Based Computational*  
619 *Modeling of Vascular Morphogenesis Using Tissue Simulation Toolkit*, pages  
620 67–127. Springer New York, New York, NY, 2015. ISBN 978-1-4939-1462-  
621 3.



- 622 [37] Paulien Hogeweg. Evolving mechanisms of morphogenesis: on the interplay  
623 between differential adhesion and cell differentiation. *Journal of Theoretical*  
624 *Biology*, 203(4):317 – 333, 2000. ISSN 0022-5193.
- 625 [38] Mikael Björklund and Samuel Marguerat. Editorial: Determinants of cell  
626 size. *Frontiers in Cell and Developmental Biology*, 5:115, 2017. ISSN 2296-  
627 634X.
- 628 [39] Wallace F. Marshall, Kevin D. Young, Matthew Swaffer, Elizabeth Wood,  
629 Paul Nurse, Akatsuki Kimura, Joseph Frankel, John Wallingford, Virginia  
630 Walbot, Xian Qu, and Adrienne HK Roeder. What determines cell size?  
631 *BMC Biology*, 10(1):101, 2012. ISSN 1741-7007.
- 632 [40] Thomas Garcia and Silvia De Monte. Group formation and the evolution  
633 of sociality. *Evolution: International Journal of Organic Evolution*, 67(1):  
634 131–141, 2013.
- 635 [41] Iaroslav Ispolatov, Martin Ackermann, and Michael Doebeli. Division of  
636 labour and the evolution of multicellularity. *Proceedings of the Royal Society*  
637 *B: Biological Sciences*, 279(1734):1768–1776, 2011.
- 638 [42] Thomas Pfeiffer and Sebastian Bonhoeffer. An evolutionary scenario for  
639 the transition to undifferentiated multicellularity. *Proceedings of the Na-*  
640 *tional Academy of Sciences*, 100(3):1095–1098, 2003. ISSN 0027-8424.  
641 doi: 10.1073/pnas.0335420100.
- 642 [43] Chikara Furusawa and Kunihiko Kaneko. Origin of multicellular organisms  
643 as an inevitable consequence of dynamical systems. *The Anatomical Record*,  
644 268(3):327–342, 2002.
- 645 [44] Andrew J Wood and Graeme J. Ackland. Evolving the selfish herd: emer-  
646 gence of distinct aggregating strategies in an individual-based model. *Pro-*  
647 *ceedings of the Royal Society B: Biological Sciences*, 274:1637 – 1642,  
648 2007.
- 649 [45] Eric Libby, Peter L Conlin, Ben Kerr, and William C Ratcliff. Stabilizing  
650 multicellularity through ratcheting. *Philosophical Transactions of the Royal*  
651 *Society B: Biological Sciences*, 371(1701):20150444, 2016.

- 652 [46] Athanasius FM Marée and Paulien Hogeweg. How amoeboids self-organize  
653 into a fruiting body: multicellular coordination in dictyostelium discoideum.  
654 *Proceedings of the National Academy of Sciences*, 98(7):3879–3883, 2001.
- 655 [47] Brian A. Camley, Juliane Zimmermann, Herbert Levine, and Wouter-Jan  
656 Rappel. Emergent collective chemotaxis without single-cell gradient sens-  
657 ing. *Phys. Rev. Lett.*, 116:098101, Mar 2016.
- 658 [48] Jordi van Gestel and Corina E. Tarnita. On the origin of biological construc-  
659 tion, with a focus on multicellularity. *Proceedings of the National Academy  
660 of Sciences*, 2017. ISSN 0027-8424. doi: 10.1073/pnas.1704631114.
- 661 [49] Silvia De Monte and Paul B. Rainey. Nascent multicellular life and the  
662 emergence of individuality. *Journal of Biosciences*, 39:237–248, 2014.
- 663 [50] Donald S. Coffey. Self-organization, complexity and chaos: The new biol-  
664 ogy for medicine. *Nature Medicine*, 4(8):882–885, 1998. ISSN 1546-170X.  
665 doi: 10.1038/nm0898-882.
- 666 [51] Christina H Stuelten, Carole A Parent, and Denise J Montell. Cell motility  
667 in cancer invasion and metastasis: insights from simple model organisms.  
668 *Nature reviews Cancer*, 18(5):296–312, 2018.
- 669 [52] Andrea Disanza, Sara Bisi, Emanuela Frittoli, Chiara Malinverno, Stefano  
670 Marchesi, Andrea Palamidessi, Abrar Rizvi, and Giorgio Scita. Is cell migra-  
671 tion a selectable trait in the natural evolution of cancer development? *Philo-  
672 sophical Transactions of the Royal Society B*, 374(1779):20180224, 2019.
- 673 [53] Lukáš Lacina, Matúš Čoma, Barbora Dvořánková, Ondřej Kodet, Nikola  
674 Melegová, Peter Gál, and Karel Smetana. Evolution of cancer progression  
675 in the context of darwinism. *Anticancer Research*, 39(1):1–16, 2019. doi:  
676 10.21873/anticanres.13074.
- 677 [54] Joost B. Beltman, Athanasius F.M. Marée, Jennifer N. Lynch, Mark J. Miller,  
678 and Rob J. de Boer. Lymph node topology dictates T cell migration behavior  
679 . *The Journal of Experimental Medicine*, 204(4):771–780, 03 2007. ISSN  
680 0022-1007.
